1 Classification: Biological Sciences, Neuroscience

2

3 **Arc restores juvenile plasticity in adult mouse visual cortex**

4

5 Short title: Arc restores juvenile plasticity in adult mice

6

7 Kyle R. Jenks<sup>1,a</sup>, Taekeun Kim<sup>1,b</sup>, Elissa D. Pastuzyn<sup>1,a</sup>, Hiroyuki Okuno<sup>c,d</sup>,

8 Andrew V. Taibi<sup>a</sup>, Haruhiko Bito<sup>d</sup>, Mark F. Bear<sup>2,b</sup>, and Jason D. Shepherd<sup>2,a</sup>

9

10 a. Department of Neurobiology and Anatomy, University of Utah, Salt Lake City

11 Utah, 84112. b. The Picower Institute for Learning and Memory, Massachusetts

12 Institute of Technology, Cambridge Massachusetts, 02139. c. Medical Innovation

13 Center, Kyoto University Graduate School of Medicine,

14 Sakyo-ku, Kyoto 606-8507, Japan. d. Department of Neurochemistry, Graduate

15 School of Medicine, The University of Tokyo, Hongo 7-3-1, Bunkyo-ku, Tokyo

16 113-0033, Japan.

17

18 <sup>1</sup>Contributed equally

19

20 <sup>2</sup>Correspondence, [mbear@mit.edu](mailto:mbear@mit.edu) and [Jason.Shepherd@neuro.utah.edu](mailto:Jason.Shepherd@neuro.utah.edu)

21

22 **Keywords:** Arc, plasticity, visual cortex, ocular dominance plasticity,

23 amblyopia, critical period

## 24 **Abstract**

25           The molecular basis for the decline in experience-dependent neural  
26 plasticity over age remains poorly understood. In visual cortex, the robust  
27 plasticity induced in juvenile mice by brief monocular deprivation (MD) during the  
28 critical period is abrogated by genetic deletion of *Arc*, an activity-dependent  
29 regulator of excitatory synaptic modification. Here we report that augmenting *Arc*  
30 expression in adult mice prolongs juvenile-like plasticity in visual cortex, as  
31 assessed by recordings of ocular dominance (OD) plasticity *in vivo*. A  
32 distinguishing characteristic of juvenile OD plasticity is the weakening of  
33 deprived-eye responses, believed to be accounted for by the mechanisms of  
34 homosynaptic long-term depression (LTD). Accordingly, we also found increased  
35 LTD in visual cortex of adult mice with augmented *Arc* expression, and impaired  
36 LTD in visual cortex of juvenile mice that lack *Arc* or have been treated *in vivo*  
37 with a protein synthesis inhibitor. Further, we found that although activity-  
38 dependent expression of *Arc* mRNA does not change with age, expression of *Arc*  
39 protein is maximal during the critical period and declines in adulthood. Finally, we  
40 show that acute augmentation of *Arc* expression in wild type adult mouse visual  
41 cortex is sufficient to restore juvenile-like plasticity. Together, our findings  
42 suggest a unifying molecular explanation for the age- and activity-dependent  
43 modulation of synaptic sensitivity to deprivation.

44

45

46

## 47 **Significance Statement:**

48           Neuronal plasticity peaks early in life during critical periods and normally  
49 declines with age, but the molecular changes that underlie this decline are not  
50 fully understood. Using the mouse visual cortex as a model, we found that  
51 activity-dependent expression of the neuronal protein Arc peaks early in life, and  
52 that loss of activity-dependent Arc expression parallels loss of synaptic plasticity  
53 in the visual cortex. Genetic overexpression of Arc prolongs the critical period of  
54 visual cortex plasticity and acute viral expression of Arc in adult mice can restore  
55 juvenile-like plasticity. These findings provide a mechanism for the loss of  
56 excitatory plasticity with age, and suggest that Arc may be an exciting therapeutic  
57 target for modulation of the malleability of neuronal circuits.

58

59 /body

## 60 **Introduction**

61           A defining feature of early postnatal brain development is the activity-  
62 dependent winnowing of synaptic connections. This process is readily  
63 demonstrated by the response of visual cortical circuits to temporary monocular  
64 deprivation (MD) during early life. When MD is initiated during an early critical  
65 period, the synapses serving the deprived eye in visual cortex lose strength and  
66 are eliminated. Deprived-eye depression diminishes with age such that by the  
67 onset of adolescence, circuits are less vulnerable to the effects of deprivation.  
68 Understanding the molecular mechanisms that underlie the effect of age on this

69 type of ocular dominance (OD) plasticity is one of the great challenges in  
70 neuroscience (1).

71 It is now well established that OD plasticity after MD occurs through  
72 synaptic plasticity of excitatory transmission, employing mechanisms that include  
73 homosynaptic long-term depression (LTD), metaplasticity and homeostatic  
74 scaling of AMPA-type glutamate receptors (2, 3). Clues into the molecular basis  
75 for the decline in juvenile plasticity have come from several diverse experimental  
76 treatments that can restore or prolong sensitivity to MD in adult animals. These  
77 include genetic manipulations that slow the maturation of cortical inhibition (4, 5),  
78 enrichment of animal housing conditions (6), increased exposure to visual  
79 stimulation (7), and enhanced modulatory neurotransmission (8). It has been  
80 suggested that a common thread connecting these varied treatments might be an  
81 increase in the ratio of excitation to inhibition (9, 10). However, it is completely  
82 unknown how, at the molecular level, general increases in cortical activity can  
83 facilitate deprivation-induced synaptic plasticity in adult visual cortex. Since the  
84 immediate early gene *Arc* is exquisitely sensitive to changes in cortical activity,  
85 and is essential for both OD plasticity and modification of excitatory synaptic  
86 transmission (11-13), we set out to determine whether availability of *Arc* limits or  
87 changes the qualities of plasticity in adults and whether up-regulating *Arc* levels  
88 in adult animals can restore juvenile synaptic plasticity.

89

## 90 **Results**

91

92 **Augmentation of Arc expression in adult mouse visual cortex extends the**  
93 **critical period of juvenile ocular dominance plasticity**

94 In young mice ( $\leq$  postnatal day (P) 40), the main consequence of short (3-  
95 4 days) MD is the robust loss of cortical responsiveness to stimulation of the  
96 deprived eye. A compensatory potentiation of responses to the non-deprived eye  
97 may also occur, typically observed with longer periods of MD (5-7 days) (14).  
98 Importantly, although open-eye potentiation after long duration MD is also  
99 observed in adult rodents, deprived-eye depression is only observed during the  
100 juvenile critical period in animals housed under standard laboratory conditions  
101 (15, 16). We predicted that augmenting Arc levels would prolong juvenile  
102 plasticity, as defined by closed-eye depression, past the conventional critical  
103 period in mouse visual cortex. To test this prediction we utilized a transgenic  
104 mouse line that expresses an additional allele of *Arc* tagged with mCherry in an  
105 activity-dependent manner that is driven by the *Arc* promoter in a similar manner  
106 to the previously characterized Arc-GFP Tg mouse line (17, 18) (Figure S1).

107 We compared the qualities of OD plasticity after short (3-4 days) MD in  
108 Arc transgenic (Arc-Tg) mice and wild-type (WT) littermate controls at P30  
109 (juvenile) and P180 (adult) using chronic recordings of visually evoked potentials  
110 (VEPs) from binocular visual cortex contralateral to the deprived eye (Figure 1A)  
111 as previously described (11). There was no significant difference between P30  
112 WT and Arc-Tg VEPs prior to MD and, following MD, both WT and Arc-Tg P30  
113 mice exhibited a significant decrease in contralateral (contra; closed eye) VEP  
114 amplitudes (WT:  $n = 7$ , Baseline =  $251 \pm 28 \mu\text{V}$ , Post-MD =  $166 \pm 12 \mu\text{V}$ ,  $p = 0.03$ ;

115 Arc-Tg:  $n = 10$ , Baseline =  $227 \pm 21 \mu\text{V}$ , Post-MD =  $159 \pm 22 \mu\text{V}$ ,  $p = 0.01$ ; paired  
116  $t$ -test; Figure 1B). As expected, adult P180 WT mice did not exhibit depression of  
117 contra VEP amplitude after MD, reflecting the loss of juvenile plasticity. In sharp  
118 contrast, P180 Arc-Tg mice still exhibited a significant decrease in contra VEPs  
119 (WT:  $n = 7$ , Baseline =  $184 \pm 19 \mu\text{V}$ , Post-MD =  $183 \pm 20 \mu\text{V}$ ,  $p = 0.9$ ; Arc-Tg:  $n =$   
120  $6$ , Baseline =  $208 \pm 26 \mu\text{V}$ , Post-MD =  $136 \pm 20 \mu\text{V}$ ,  $p = 0.02$ ; paired  $t$ -test; Figure  
121 1C), comparable to the decrease observed in WT juveniles. There was a  
122 significant treatment by genotype interaction, indicating that OD plasticity differs  
123 in Arc-Tg mice compared with WT mice (repeated measures ANOVA;  $p =$   
124  $0.0092$ ).

125 Because the chronic VEP method enables measurements of response  
126 strength in the same mouse before and after MD, we can also analyze the  
127 qualities of the OD shift by plotting the fractional changes in response magnitude  
128 to stimulation of the deprived contra eye and the ipsi eye (19, 20). This analysis  
129 confirms that at P30, both WT and Arc-Tg mice exhibit robust and comparable  
130 levels of contralateral eye depression, and a variable potentiation of the non-  
131 deprived ipsilateral eye (Figure 1D, square symbols; WT: contralateral  
132 depression =  $0.7 \pm 0.1$ , ipsilateral potentiation =  $1.4 \pm 0.2$ ; Arc-Tg: contralateral  
133 depression =  $0.7 \pm 0.1$ , ipsilateral potentiation =  $1.3 \pm 0.1$ ,  $p = 0.9$ ; MANOVA).  
134 There was, however, a significant difference in the qualities of OD plasticity in  
135 WT and Arc-Tg adult mice (Figure 1D, round symbols). In WT mice, the OD shift  
136 was accounted for entirely by ipsi eye potentiation (Fig. 1D, open circles),  
137 whereas the shift in Arc-Tg mice (Fig. 1D, filled circles) was solely due to contra

138 eye depression (WT: contralateral depression =  $1.0 \pm 0.01$ , ipsilateral potentiation  
139 =  $1.3 \pm 0.1$ ; Arc-Tg: contralateral depression =  $0.7 \pm 0.1$ , ipsilateral potentiation =  
140  $0.9 \pm 0.2$ ,  $p = 0.03$ ; MANOVA; Figure 1D).

141 These data show that augmenting Arc levels in adult mice prolongs  
142 juvenile-like OD plasticity, as evidenced by deprivation-induced synaptic  
143 depression, well past the conventional critical period in mice.

144

145 **Activity-dependent Arc protein expression is high during the critical period**  
146 **and low in adulthood**

147 We reasoned that if availability of Arc influences the qualities of OD plasticity, Arc  
148 expression might decline as the animal ages. In mouse visual cortex, Arc is first  
149 detected after eye-opening (~P14) and expression steadily increases until ~P30,  
150 corresponding to the age of peak sensitivity to MD (21). To determine whether  
151 Arc levels decline with age, WT or Arc-Tg mice were sacrificed at P30 or P180.  
152 Basal Arc expression in visual cortex is highly variable under standard housing  
153 conditions (21); therefore, we housed mice in the dark for 24 h, then either  
154 sacrificed them immediately (“dark” condition), or exposed them to light for 2 h  
155 (“light” condition) before sacrifice ( $n = 6/\text{group}$ ) (22). The brain was fixed,  
156 sectioned at  $30 \mu\text{m}$  on a cryostat, and immunohistochemistry (IHC) was  
157 performed for Arc protein on sections of brain containing primary visual cortex.  
158 The integrated density of Arc-expressing cells in layer IV of visual cortex was  
159 measured with the experimenter blind to genotype and age (Figure 2A). A three-  
160 way ANOVA comparing genotype (WT or Arc-Tg), age (P30 or P180), and

161 condition (dark or light) revealed a main effect of genotype ( $p < 0.0001$ ), age ( $p =$   
162  $0.02$ ), and condition ( $p < 0.0001$ ), as well as a genotype x condition interaction ( $p$   
163  $= 0.02$ ). *Post hoc* Student's *t*-tests showed that in P30 mice, light significantly  
164 induced Arc expression in both WT and Arc-Tg mice (WT: light > dark; light:  $4.5 \pm$   
165  $1.3$ , dark:  $1 \pm 0.6$ ,  $p = 0.02$ ; Arc-Tg: light > dark; light:  $8.2 \pm 1$ , dark:  $2.7 \pm 2.7$ ,  $p =$   
166  $0.002$ ). However, Arc-Tg mice expressed significantly more Arc after light  
167 exposure than WT mice ( $p = 0.008$ ). At P180, WT mice no longer showed  
168 detectable Arc expression, even after light exposure. Arc-Tg mice, on the other  
169 hand, exhibited significant Arc expression after light exposure (light:  $7.1 \pm 0.8$ ,  
170 dark:  $1.8 \pm 1.2$ ;  $p = 0.001$ ). Furthermore, levels of light-induced Arc in P180 Arc-  
171 Tg mice were not significantly different from P30 Arc-Tg mice ( $p > 0.05$ ),  
172 suggesting that activity-dependent expression of Arc in Arc-Tg mice does not  
173 decline with age. These data show that activity-dependent Arc protein expression  
174 significantly declines with age in WT but not in Arc-Tg mice. This loss of  
175 endogenous Arc protein over age correlates with the decline of deprived-eye  
176 depression following MD.

177 Arc transcription and translation are exquisitely regulated in the brain and  
178 are finely tuned to experience and neuronal activity (12). Of particular interest,  
179 transcription and translation of Arc can be independently regulated by activity  
180 (23). We therefore sought to determine whether endogenous activity-dependent  
181 Arc mRNA expression also declines with age. Mice underwent dark and light  
182 exposure as described above ( $n = 3-5$ /group). The visual cortex was dissected  
183 and RT-qPCR was performed on lysates (Figure 2B). A three-way ANOVA



184 revealed a main effect of genotype ( $p = 0.002$ ) and condition ( $p = 0.0002$ ) but not  
185 age. *Post hoc t*-tests showed that light-induced *Arc* mRNA expression was higher  
186 in Arc-Tg than WT mice (P30 WT:  $2.9 \pm 0.9$ , P30 Arc-Tg:  $9.8 \pm 1.6$ ,  $p < 0.0001$ ;  
187 P180 WT:  $3.3 \pm 0.7$ , P180 Arc-Tg:  $16.7 \pm 1.1$ ,  $p < 0.0001$ ). Interestingly, however,  
188 levels of activity-induced *Arc* mRNA expression did not differ with age in either  
189 genotype ( $p > 0.05$ ). These data suggest that availability of endogenous *Arc*  
190 mRNA alone cannot fully explain the differences in Arc protein expression across  
191 the lifespan of WT mice and point to the possibility of a decrease in either  
192 activity-dependent translation or stability of endogenous Arc protein in adult  
193 visual cortex. Nevertheless, the increased expression of mRNA in the active  
194 visual cortex of Arc-Tg mice is paralleled by a proportional increase in protein.

195

### 196 **Augmenting Arc expression restores LTD in adult visual cortex**

197 Deprived-eye depression occurs via mechanisms shared with LTD (3),  
198 which also diminishes with age (24). In addition to the profound deficit in OD  
199 plasticity (11), juvenile (P20-25) Arc knock-out (KO) mice also exhibit impaired  
200 layer IV LTD in visual cortex, induced in slices with low-frequency stimulation  
201 (LFS) of the white matter, as compared with WT mice that showed robust LFS  
202 LTD (WT:  $n = 7$  slices, 4 mice  $67.5 \pm 5.7\%$ ; Arc KO:  $n = 7$  slices, 5 mice  $90.6 \pm$   
203  $4.6\%$ ;  $p < 0.001$ , *t*-test; Figure 3A). We therefore hypothesized that the  
204 persistence of juvenile OD plasticity in adult Arc-Tg mice was accompanied (and  
205 perhaps accounted for) by continued expression of juvenile-like LTD. To ensure  
206 expression of Arc protein in the slices, mice were exposed briefly (30 min) to an

207 enriched environment prior to sacrifice as described previously (23). We  
208 measured LTD at P30-40, when both WT and Arc-Tg mice show comparable  
209 juvenile OD plasticity, characterized by robust deprived-eye depression after MD.  
210 At this age, LTD in WT and Arc-Tg mice was also comparable (WT: n = 9 slices,  
211 7 mice  $75.4 \pm 11.6\%$ ; Arc-Tg: n = 7 slices, 6 mice  $81.3 \pm 7.1\%$ ;  $p > 0.5$ , *t*-test;  
212 Figure 3B). However, in striking agreement with the findings of juvenile levels of  
213 deprived-eye depression following MD (Figure 1), we found that LFS induced  
214 significant LTD in adult (P180-200) Arc-Tg slices but not in WT littermate slices  
215 (WT: n = 11 slices, 6 mice  $102.8\% \pm 8.7$ ; Arc Tg: n = 12 slices, 6 mice  $74.5 \pm$   
216  $7.9\%$ ; Figure 3C). The difference between genotypes was significant ( $p = 0.04$ , *t*-  
217 test).

218

### 219 **Inhibition of protein synthesis *in vivo* impairs LTD in juvenile visual cortex**

220 The apparent requirement of Arc translation for deprived-eye depression  
221 may offer a partial explanation for why juvenile OD plasticity following brief MD is  
222 impaired when the visual cortex is infused locally with the protein synthesis  
223 inhibitor cycloheximide (CHX) (25). If this explanation is correct, and the  
224 mechanisms of LTD are utilized for deprived eye depression following MD, we  
225 would also expect to observe reduced LTD *ex vivo* following microinfusion of  
226 CHX into visual cortex. To test this prediction, WT visual cortex was infused *in*  
227 *vivo* via an osmotic minipump with CHX for four days as described (25), and then  
228 slices were prepared to study LTD. Similar to our observations in the Arc KO,  
229 there was no LTD in juvenile visual cortex after chronic inhibition of protein

230 synthesis (saline:  $n = 5$  slices, 4 mice,  $72.4 \pm 8.6\%$ ; CHX:  $n = 7$  slices, 5 mice,  
231  $96.2 \pm 5.9\%$ ;  $t$ -test,  $p = 0.02$ , Figure 3D). Together, these findings are consistent  
232 with the hypothesis that translation of Arc gates the mechanism of deprivation-  
233 induced synaptic depression in visual cortex.

234

235 **Acute expression of Arc in adult mouse visual cortex is sufficient to re-**  
236 **open the critical period of juvenile ocular dominance plasticity**

237 Augmenting the availability of Arc protein throughout development and  
238 into adulthood prolongs the critical period for juvenile OD plasticity (Figure 1).  
239 However, this does not address whether restoring Arc protein expression is  
240 sufficient to re-open the critical period of OD plasticity once it has closed. To  
241 determine whether acutely increasing Arc protein in adult visual cortex is  
242 sufficient to restore juvenile-like plasticity, we expressed Arc using a lentivirus  
243 injected into visual cortex of P180 WT mice (Figure 4A). Lentivirus containing  
244 GFP-Arc or GFP was injected into layer IV of visual cortex and baseline VEP  
245 recordings were conducted one week after virus injection. Unlike the Arc-Tg  
246 mice, viral Arc over-expression is constitutively driven and not activity-dependent.  
247 Based on previous studies (26, 27), we predicted that VEP amplitude might be  
248 depressed by constitutive Arc expression since the VEP is mainly a synaptic  
249 population response that correlates with surface AMPAR expression (11).  
250 Indeed, a significant decrease in overall binocular VEP amplitude was observed  
251 compared with GFP-injected mice (GFP-injected mice:  $197 \pm 30 \mu\text{V}$ ; GFP-Arc-  
252 injected mice:  $75 \pm 21 \mu\text{V}$ ;  $p = 0.005$ ; Figure 4B). No deprived-eye depression

253 was observed in GFP-injected mice following short (3-4 days) MD (GFP,  
254 normalized to baseline contra values:  $n = 11$ , contra Baseline =  $1 \pm 0.2$ , Post-MD  
255 =  $0.9 \pm 0.2$ ,  $p = 0.4$ ; paired  $t$ -test; Figure 4C). However, despite a reduction in  
256 baseline VEP magnitude, contra VEP responses were further reduced after MD  
257 in GFP-Arc-injected mice (GFP-Arc, normalized to baseline contra values:  $n = 5$ ,  
258 contra Baseline =  $1 \pm 0.2$ , Post-MD =  $0.6 \pm 0.2$ ,  $p = 0.02$ ; Figure 4D). Further,  
259 when comparing the fractional change in contra and ipsi-eye visual responses  
260 following MD, there was a significant difference between GFP vs. GFP-Arc  
261 injected mice (GFP: contralateral depression =  $0.9 \pm 0.1$ , ipsilateral potentiation =  
262  $1.4 \pm 0.1$ ; GFP-Arc: contralateral depression =  $0.5 \pm 0.1$ , ipsilateral potentiation  
263  $1.0 \pm 0.1$ ;  $p = 0.01$ , MANOVA; Figure 4E). Critically, the fractional OD shift in the  
264 P180 GFP-injected mice was the same as non-injected WT P180 ( $p = 0.3$ ;  
265 MANOVA), indicating virus injection had no effect on cortical responses or OD  
266 plasticity. Additionally, the fractional OD shift in P180 WT mice injected with  
267 GFP-Arc did not significantly differ from age matched Arc-Tg mice, indicating that  
268 acute, viral expression of Arc can restore OD plasticity to a similar degree to that  
269 achieved by transgenic augmentation of Arc throughout life ( $p = 0.6$ ; MANOVA;  
270 Figure 4E). Intriguingly, not only was contra-eye depression observed in Arc-Tg  
271 mice but a lack of ipsi-eye potentiation was also observed, further suggesting  
272 that Arc protein levels control the qualitative aspects of OD plasticity.

273         These data show that acutely increasing Arc protein expression in visual  
274 cortex is sufficient to restore juvenile OD plasticity in adult visual cortex,

275 suggesting the availability of Arc protein is sufficient to allow deprivation-induced  
276 synaptic depression in adult visual cortex.

277

## 278 **Discussion**

279 Here we show that acute or chronic up-regulation of Arc protein in adult  
280 mice renders visual cortical synapses sensitive to deprived-eye depression  
281 following MD, recapitulating juvenile critical period OD plasticity. In agreement  
282 with the prevailing hypothesis that LTD mechanisms mediate deprived eye  
283 depression (3), overexpression of Arc also prolongs juvenile-like LTD in adult  
284 visual cortex. Conversely, elimination of Arc expression or inhibition of mRNA  
285 translation in juvenile visual cortex prevents both deprived-eye depression after  
286 MD *in vivo* and LTD *ex vivo*. Together, these data indicate that availability of Arc  
287 is critical for the expression of juvenile plasticity in visual cortex.

288 Considering the key role for Arc in determining the qualities of OD  
289 plasticity in visual cortex of juvenile animals, we predicted that the loss of  
290 deprived-eye depression after MD in adult visual cortex correlates with a lack of  
291 activity-dependent Arc expression. Indeed, we found that endogenous Arc  
292 protein expression in the active visual cortex declines with age, coincident with  
293 the loss of juvenile plasticity. Surprisingly, however, we found that activity-  
294 dependent Arc mRNA expression is comparable in juvenile (~P30) and adult  
295 (~P180) WT mouse visual cortex. This finding implies that the normal decline in  
296 Arc protein expression in active visual cortex results from a decrease in  
297 experience-dependent Arc translation, which can occur via mechanisms that are

298 distinct from those regulating activity-dependent transcription (12, 23). The lack  
299 of decline in activity-dependent Arc expression in Arc-Tg mice could be due to  
300 the increase in Arc mRNA levels. Alternatively or in addition, the extra Arc allele  
301 in the Arc-Tg line does not contain an intron in the 3'UTR region, which may  
302 result in an increase in mRNA stability in dendrites due to a lack of nonsense  
303 mediated decay (28) and would thus potentially have a longer half-life than  
304 endogenous Arc mRNA. Restoration of juvenile plasticity in adult mice injected  
305 with GFP-Arc suggests that the presence of Arc protein in visual cortex is  
306 sufficient for juvenile OD plasticity.

307 Deprived-eye depression after MD is believed to occur via mechanisms  
308 revealed by the study of LTD in layer IV. LTD in this layer is triggered by NMDA  
309 receptor activation and expressed by internalization of AMPA receptors (29).  
310 Although NMDA receptor-dependent LTD is not affected by acute (*in vitro*)  
311 inhibition of protein synthesis (30), we discovered that chronic inhibition of protein  
312 synthesis by *in vivo* microinfusion of CHX, which has been shown to prevent  
313 deprived-eye depression (25), impairs layer IV LTD *ex vivo*. These findings are  
314 reminiscent of the recent observation that chronic, but not acute, inhibition of  
315 metabotropic glutamate receptor 5 (mGluR5) can disrupt both deprived-eye  
316 depression after MD and LTD in layer IV (19). Activity-dependent synthesis of  
317 Arc protein occurs downstream of mGluR5 activation (12, 23). Thus a simple  
318 explanation for this constellation of findings is that NMDA receptor-dependent  
319 LTD and deprived eye depression require Arc protein as a necessary cofactor,  
320 and are thus inhibited by chronic block of either mGluR5 or protein synthesis.

321 Decreased availability of Arc, and a consequent down-regulation of the  
322 mechanisms of LTD, also offers a simple molecular explanation for the age-  
323 dependent loss of synaptic sensitivity to visual deprivation.

324 Inhibition develops later than excitatory transmission in the cortex, and it  
325 has been suggested that the consequent decrease in the ratio of excitation to  
326 inhibition brings the critical period for juvenile plasticity to a close (10). We  
327 propose that decreasing the excitability of the visual cortex ultimately affects OD  
328 plasticity by preventing the activity-dependent expression of key activity-  
329 regulated plasticity proteins at the synapse that are important mediators of  
330 excitatory synaptic modification, such as Arc. Indeed, in addition to manipulations  
331 of inhibition, OD plasticity can be restored in adult rodents exposed to an  
332 enriched visual environment (6, 7), treated chronically with fluoxetine (8), or  
333 genetically engineered to express constitutively active CREB (31), manipulations  
334 that also increase Arc protein levels (32). The precise regulation of Arc  
335 expression during development, therefore, provides a potential mechanistic link  
336 between the maturation of inhibition and changes in the qualities of excitatory  
337 synaptic modification over the lifespan.

338

## 339 **Materials and Methods**

### 340 ***Animals***

341 Lines of Tg mouse harboring the Arc-promoter mCherry-Arc transgene (mCherry-  
342 Arc/Arc) were generated as previously described (18). Further details can be  
343 found in supplementary methods section. Requests for mice should be directly

344 addressed to H.B. or H.O. Arc-KO mice were obtained from Dr. Kuan Wang  
345 (NIH) and were previously described (22). Both male and female mice were used  
346 and the experimenter was blind to genotype in all experiments. Male C57BL/6  
347 mice (Charles River Laboratories) at the age of P22-P25 were used for the Alzet  
348 pump implantation experiments. Male C57BL/6 mice (Jackson Laboratory) at the  
349 age of P180 were used for lentiviral VEP experiments. All procedures were  
350 approved by the Institutional Animal Care and Use Committees of Massachusetts  
351 Institute of Technology, the University of Utah, and the University of Tokyo  
352 Graduate School of Medicine, in conjunction with NIH guidelines.

353

#### 354 ***Virus production/injection***

355 *Virus production:* Dr. Kimberly Huber generously donated FUGW lentiviral  
356 plasmids for Ubq-GFP and Ubq-GFP-Arc. Injections were carried out as  
357 previously described (33).

358

359 ***VEP recordings, slice electrophysiology*** and ***immunohistochemistry*** were  
360 carried out as previously described (11, 19). Detailed Methods on  
361 immunohistochemistry, quantitative RT-PCR, VEP recordings and slice  
362 electrophysiology can be found in supplementary methods.

363

#### 364 ***Statistics***

365 ANOVA/MANOVA tests and *post hoc* Student's *t*-tests were performed using  
366 JMP Pro software (v12; SAS Institute, Cary, NC). For slice electrophysiology



367 experiments, *post hoc* paired *t*-tests were performed to determine the  
368 significance of changes before and after LFS, and unpaired *t*-tests were  
369 performed to test the differences between groups after LFS.

## 370 **Acknowledgements**

371 K.R.J. was supported by the University of Utah Neuroscience training program  
372 (5T32NS076067) and an NIH NRSA F31 (MH112326). E.D.P. was supported by  
373 a developmental biology training grant at the University of Utah  
374 (5T32HD00749117). This work was funded by AMED-CREST (H.B.), KAKENHI  
375 grants from JSPS (H.O., H.B.), a grant-in-aid from MHLW-Japan (H.O., H.B), the  
376 NIH (R00-NS076364, J.D.S), the Howard Hughes Medical Institute, and the  
377 Picower Institute Innovation Fund (M.F.B.). We thank Dr. Roger Y. Tsien  
378 (University of California San Diego) for the gift of the mCherry plasmid. We thank  
379 Dr. Kimberly Huber (University of Texas Southwestern Medical Center) for the  
380 FUGW CMV-GFP and CMV-Arc-GFP plasmids and Dr. Kuan Wang (NIH) for the  
381 Arc KO mouse line.

382

## 383 **Contributions**

384 E.D.P. performed the immunohistochemistry experiments. T.K. and J.D.S.  
385 performed slice electrophysiology experiments, T.K. performed *in vivo* infusion  
386 experiments, and K.R.J. and J.D.S performed *in vivo* VEP recordings. K.R.J  
387 prepared and injected lentivirus *in vivo*. A.V.T. conducted RT-qPCR experiments.  
388 H.O. and H.B. generated the Arc-Tg mouse line. E.D.P., T.K., K.R.J., A.V.T. and

389 J.D.S. performed data analysis. M.F.B. and J.D.S wrote the manuscript;  
390 conceived, designed and directed the study.

391

392

## 393 **References**

- 394 1. Hubener M & Bonhoeffer T (2014) Neuronal plasticity: beyond the critical  
395 period. *Cell* 159(4):727-737.
- 396 2. Espinosa JS & Stryker MP (2012) Development and plasticity of the  
397 primary visual cortex. *Neuron* 75(2):230-249.
- 398 3. Cooke SF & Bear MF (2014) How the mechanisms of long-term synaptic  
399 potentiation and depression serve experience-dependent plasticity in  
400 primary visual cortex. *Philos Trans R Soc Lond B Biol Sci*  
401 369(1633):20130284.
- 402 4. Hensch TK, *et al.* (1998) Local GABA circuit control of experience-  
403 dependent plasticity in developing visual cortex. *Science* 282(5393):1504-  
404 1508.
- 405 5. Choi SY, Morales B, Lee HK, & Kirkwood A (2002) Absence of long-term  
406 depression in the visual cortex of glutamic Acid decarboxylase-65 knock-  
407 out mice. *The Journal of neuroscience : the official journal of the Society*  
408 *for Neuroscience* 22(13):5271-5276.
- 409 6. Greifzu F, *et al.* (2014) Environmental enrichment extends ocular  
410 dominance plasticity into adulthood and protects from stroke-induced  
411 impairments of plasticity. *Proc Natl Acad Sci U S A* 111(3):1150-1155.

- 412 7. Matthies U, Balog J, & Lehmann K (2013) Temporally coherent visual  
413 stimuli boost ocular dominance plasticity. *The Journal of neuroscience* :  
414 *the official journal of the Society for Neuroscience* 33(29):11774-11778.
- 415 8. Maya Vetencourt JF, *et al.* (2008) The antidepressant fluoxetine restores  
416 plasticity in the adult visual cortex. *Science* 320(5874):385-388.
- 417 9. Hensch TK & Fagiolini M (2005) Excitatory-inhibitory balance and critical  
418 period plasticity in developing visual cortex. *Progress in brain research*  
419 147:115-124.
- 420 10. Jiang B, Huang ZJ, Morales B, & Kirkwood A (2005) Maturation of  
421 GABAergic transmission and the timing of plasticity in visual cortex. *Brain*  
422 *research. Brain research reviews* 50(1):126-133.
- 423 11. McCurry CL, *et al.* (2010) Loss of Arc renders the visual cortex impervious  
424 to the effects of sensory experience or deprivation. *Nat Neurosci*  
425 13(4):450-457.
- 426 12. Shepherd JD & Bear MF (2011) New views of Arc, a master regulator of  
427 synaptic plasticity. *Nat Neurosci* 14(3):279-284.
- 428 13. Shepherd JD, *et al.* (2006) Arc/Arg3.1 mediates homeostatic synaptic  
429 scaling of AMPA receptors. *Neuron* 52(3):475-484.
- 430 14. Frenkel MY & Bear MF (2004) How monocular deprivation shifts ocular  
431 dominance in visual cortex of young mice. *Neuron* 44(6):917-923.
- 432 15. Sawtell NB, *et al.* (2003) NMDA receptor-dependent ocular dominance  
433 plasticity in adult visual cortex. *Neuron* 38(6):977-985.

- 434 16. Sato M & Stryker MP (2008) Distinctive features of adult ocular dominance  
435 plasticity. *The Journal of neuroscience : the official journal of the Society*  
436 *for Neuroscience* 28(41):10278-10286.
- 437 17. Kawashima T, *et al.* (2009) Synaptic activity-responsive element in the  
438 Arc/Arg3.1 promoter essential for synapse-to-nucleus signaling in  
439 activated neurons. *Proc Natl Acad Sci U S A* 106(1):316-321.
- 440 18. Okuno H, *et al.* (2012) Inverse synaptic tagging of inactive synapses via  
441 dynamic interaction of Arc/Arg3.1 with CaMKIIbeta. *Cell* 149(4):886-898.
- 442 19. Sidorov MS, Kaplan ES, Osterweil EK, Lindemann L, & Bear MF (2015)  
443 Metabotropic glutamate receptor signaling is required for NMDA receptor-  
444 dependent ocular dominance plasticity and LTD in visual cortex. *Proc Natl*  
445 *Acad Sci U S A* 112(41):12852-12857.
- 446 20. Dolen G, *et al.* (2007) Correction of fragile X syndrome in mice. *Neuron*  
447 56(6):955-962.
- 448 21. Tagawa Y, Kanold PO, Majdan M, & Shatz CJ (2005) Multiple periods of  
449 functional ocular dominance plasticity in mouse visual cortex. *Nat*  
450 *Neurosci* 8(3):380-388.
- 451 22. Wang KH, *et al.* (2006) In vivo two-photon imaging reveals a role of arc in  
452 enhancing orientation specificity in visual cortex. *Cell* 126(2):389-402.
- 453 23. Jakkamsetti V, *et al.* (2013) Experience-induced Arc/Arg3.1 primes CA1  
454 pyramidal neurons for metabotropic glutamate receptor-dependent long-  
455 term synaptic depression. *Neuron* 80(1):72-79.

- 456 24. Dudek SM & Friedlander MJ (1996) Developmental down-regulation of  
457 LTD in cortical layer IV and its independence of modulation by inhibition.  
458 *Neuron* 16(6):1097-1106.
- 459 25. Taha S & Stryker MP (2002) Rapid ocular dominance plasticity requires  
460 cortical but not geniculate protein synthesis. *Neuron* 34(3):425-436.
- 461 26. Rial Verde EM, Lee-Osbourne J, Worley PF, Malinow R, & Cline HT  
462 (2006) Increased expression of the immediate-early gene *arc/arg3.1*  
463 reduces AMPA receptor-mediated synaptic transmission. *Neuron*  
464 52(3):461-474.
- 465 27. Chowdhury S, *et al.* (2006) Arc/Arg3.1 interacts with the endocytic  
466 machinery to regulate AMPA receptor trafficking. *Neuron* 52(3):445-459.
- 467 28. Giorgi C, *et al.* (2007) The EJC factor eIF4AIII modulates synaptic  
468 strength and neuronal protein expression. *Cell* 130(1):179-191.
- 469 29. Crozier RA, Wang Y, Liu CH, & Bear MF (2007) Deprivation-induced  
470 synaptic depression by distinct mechanisms in different layers of mouse  
471 visual cortex. *Proceedings of the National Academy of Sciences of the*  
472 *United States of America* 104(4):1383-1388.
- 473 30. Huber KM, Kayser MS, & Bear MF (2000) Role for rapid dendritic protein  
474 synthesis in hippocampal mGluR-dependent long-term depression.  
475 *Science* 288(5469):1254-1257.
- 476 31. Pham TA, *et al.* (2004) A semi-persistent adult ocular dominance plasticity  
477 in visual cortex is stabilized by activated CREB. *Learning & memory*  
478 11(6):738-747.

- 479 32. Li Y, *et al.* (2015) Reversal of age-associated cognitive deficits is  
480 accompanied by increased plasticity-related gene expression after chronic  
481 antidepressant administration in middle-aged mice. *Pharmacol Biochem*  
482 *Behav* 135:70-82.
- 483 33. Kaplan ES, *et al.* (2016) Contrasting roles for parvalbumin-expressing  
484 inhibitory neurons in two forms of adult visual cortical plasticity. *Elife* 5.

485

## 486 **Figure Legends**

487 **Figure 1. Arc-Tg mice exhibit juvenile-like OD plasticity well past the**  
488 **conventional critical period.** (A) Schematic of recording site for VEPs in layer  
489 IV of binocular visual cortex. (B) At P30, both WT and Arc-Tg mice show a  
490 significant decrease in contralateral (closed eye/contra) VEP amplitude following  
491 MD (WT  $n = 7$ ,  $*p = 0.03$ ; Arc-Tg  $n = 10$ ,  $*p = 0.01$ ). Additionally, Arc-Tg mice  
492 exhibited a small but significant increase in ipsilateral (open eye/ipsi) VEPs (Arc-  
493 Tg  $p = 0.008$ ). There is no significant difference between WT and Arc-Tg animals  
494 before or after MD. (C) At P180, only Arc-Tg mice exhibit a significant decrease  
495 in contra VEPs (Arc-Tg  $n = 6$ ,  $*p = 0.02$ ). (D) Plot of the fractional change in  
496 contralateral (X-axis) and ipsilateral (Y-axis) eye VEPs following MD (same data  
497 as in B and C). At P30 there is no significant difference between WT and Arc-Tg  
498 mice. However, at P180 there is a significant difference between the fractional  
499 change of WT and Arc-Tg mice following MD ( $p = 0.03$ ). Data are represented as  
500 mean  $\pm$  S.E.M.

501

502 **Figure 2. Activity-dependent Arc protein but not mRNA expression declines**  
503 **with age in WT mouse visual cortex but not in Arc-Tg mice. (A)**

504 Immunohistochemistry for Arc expression in layers I-IV of visual cortex after 24 h  
505 of being housed in the dark, or 24 h of dark-housing followed by 2 h of light  
506 exposure. Layer IV Arc expression is quantified in the graphs (n = 6/group). Light  
507 increased Arc expression in both WT and Arc-Tg mice at P30 (WT \* $p = 0.02$ ; Arc-  
508 Tg  $p = 0.002$ ), but Arc levels were higher in Arc-Tg mice (# $p = 0.008$ ). At P180,  
509 WT mice did not express Arc after light exposure, while Arc-Tg mice exhibited  
510 the same light-induced increase in Arc observed at P30 (\* $p = 0.001$ ). Scale bar =  
511 100  $\mu\text{m}$ . (B) WT and Arc-Tg mice were dark housed for 24 h and then either  
512 sacrificed in the dark (“dark” condition) or exposed to light for 2 h prior to sacrifice  
513 (“light” condition). qRT-PCR was run on dissected visual cortex to quantify Arc  
514 mRNA expression. All values were first normalized to GAPDH to control for total  
515 RNA levels. Light induced Arc mRNA expression was higher in Arc-Tg mice than  
516 WT mice at both P30 and P180 (P30 \* $p < 0.0001$ ; P180 \* $p < 0.0001$ ). However,  
517 light-induced mRNA expression did not decrease with age in WT mice. Plotted  
518 data is normalized to P30 WT dark (n = 5 for WT Light, n = 4 for Arc-Tg light, and  
519 n = 3 for all dark groups). Data are represented as mean  $\pm$  S.E.M.

520

521 **Figure 3. Arc and protein translation are required for LTD in layer IV of**  
522 **visual cortex. (A)** Low frequency stimulation (LFS, 900 stimuli at 1 Hz) induces  
523 robust LTD in juvenile (P20-P25) WT but not Arc-KO slices (average of last five  
524 minutes of recordings normalized to the baseline; WT n = 4 mice; KO n = 5, \* $p <$

525 0.001). (B) LFS induced LTD to the same degree in young (P30-40) WT and Arc-  
526 Tg slices (WT n = 7; Arc-Tg n = 6,  $p > 0.5$ ). (C). LFS induces robust LTD in adult  
527 (P180-200) Arc-Tg but not WT slices (WT n = 11; Arc-Tg n = 6,  $*p = 0.04$ ). (D)  
528 LFS induced LTD in juvenile (P25-30) visual cortex previously infused with saline  
529 but not in visual cortex infused with cycloheximide (CHX) (Saline n = 4; CHX n =  
530 5,  $*p = 0.02$ ). Data are represented as mean  $\pm$  S.E.M.

531 **Figure 4. Acute Arc expression in adult mouse visual cortex is sufficient to**  
532 **restore juvenile OD plasticity.** P180 WT mice were injected unilaterally in the  
533 visual cortex with lentivirus expressing either GFP alone or GFP-Arc. (A)  
534 Representative image of virally driven GFP expression in binocular visual cortex  
535 and timeline of the experiment. The white dashed lines demarcate the cortical  
536 layers, as well as the position of the tip of the recording electrode. (B) GFP and  
537 GFP-Arc injected P180 mice were visually stimulated prior to MD with both eyes  
538 open to record binocular baseline VEPs. GFP-Arc injected mice had significantly  
539 smaller VEPs than GFP injected mice (GFP n = 11; GFP-Arc n = 5,  $*p = 0.005$ ).  
540 Traces represent average VEPs for GFP and GFP-Arc injected mice. (C) Data  
541 was normalized to baseline contra values. There was no significant change in  
542 Contra VEP amplitudes following MD in GFP-injected animals ( $p > 0.05$ ),  
543 however there was a significant ipsi increase ( $*p = 0.003$ ). (D) Data was  
544 normalized to baseline contra values. GFP-Arc injected mice exhibited significant  
545 contra depression following MD ( $*p = 0.016$ ) and no change in ipsi responses.  
546 Averaged VEP traces are presented above the graphs. (E) Plot of the fractional  
547 change in contralateral (X-axis) and ipsilateral (Y-axis) eye VEPs following MD



548 (same data as in C and D; Non-injected WT and Arc-Tg data from Figure 1 B).  
549 There is a significant difference between the fractional change in visual  
550 responses between GFP and GFP-Arc injected mice ( $p < 0.01$ ). GFP-injected  
551 mice exhibit the same lack of change as non-injected P180 WT mice ( $p = 0.3$ ),  
552 while GFP-Arc injected mice exhibit the same degree of change as non-injected  
553 P180 Arc-Tg mice ( $p = 0.6$ ). Data are represented as mean  $\pm$  S.E.M.

554

555

556

557

558

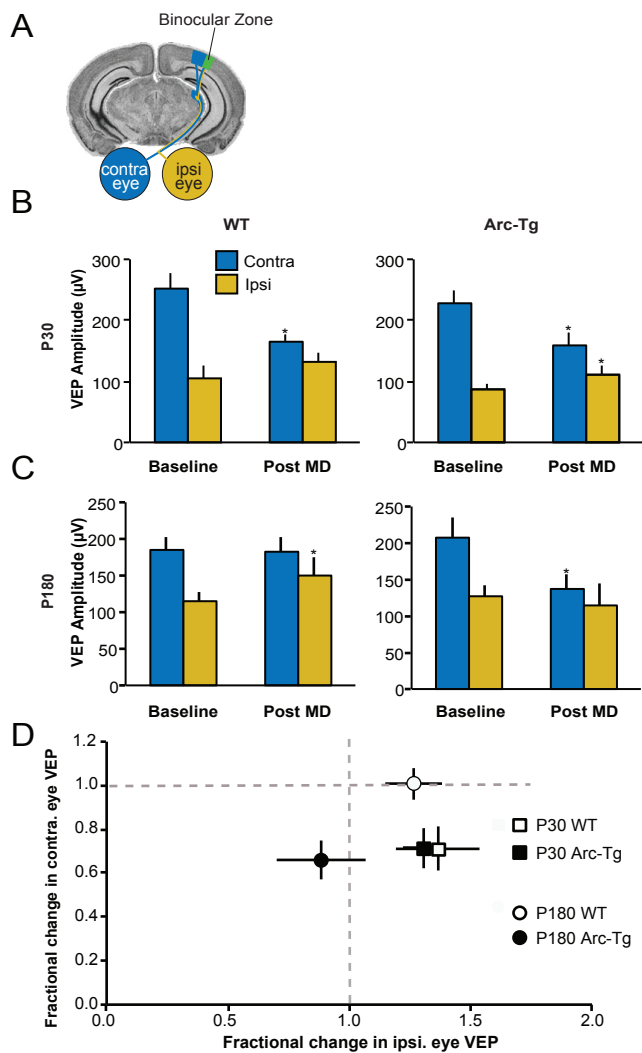

**Figure 1**

A

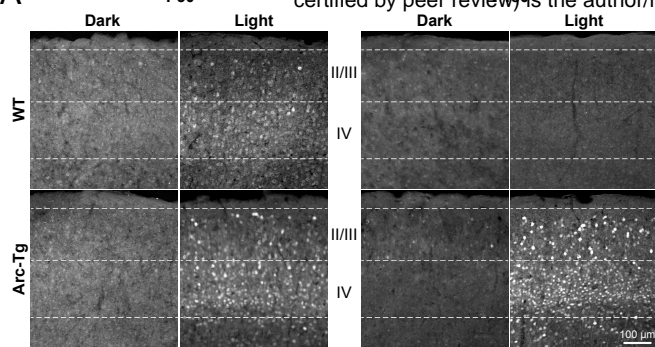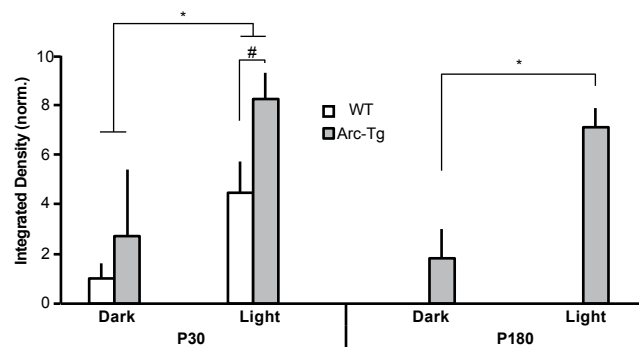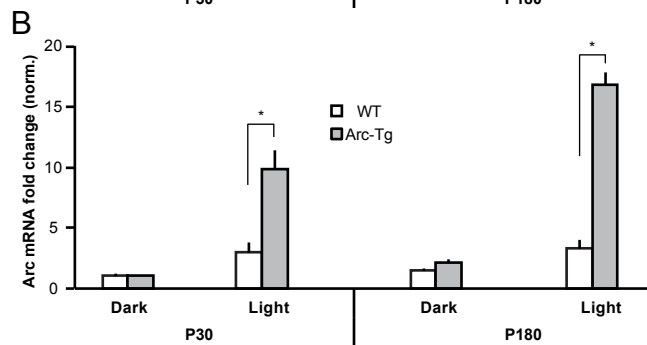

Figure 2

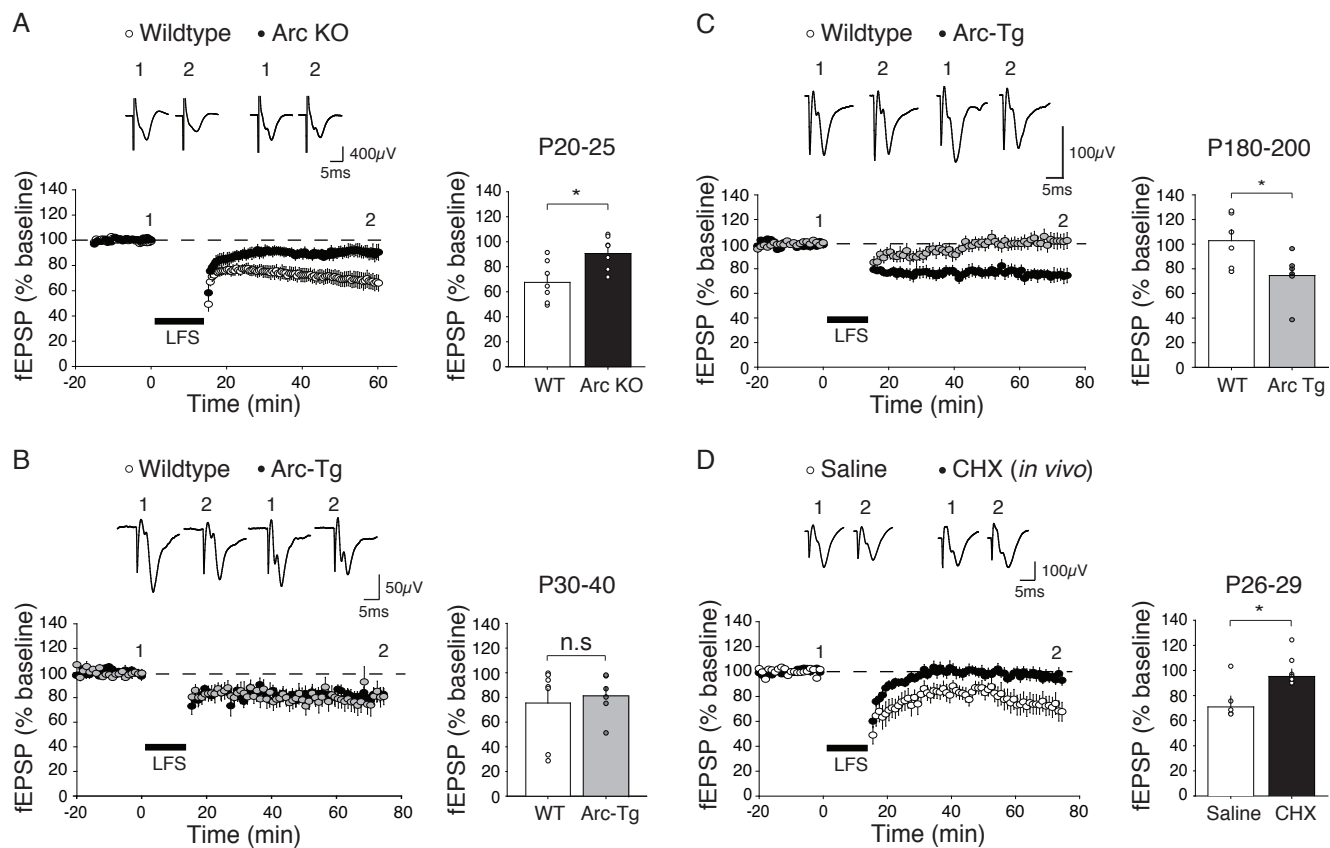

**Figure 3**

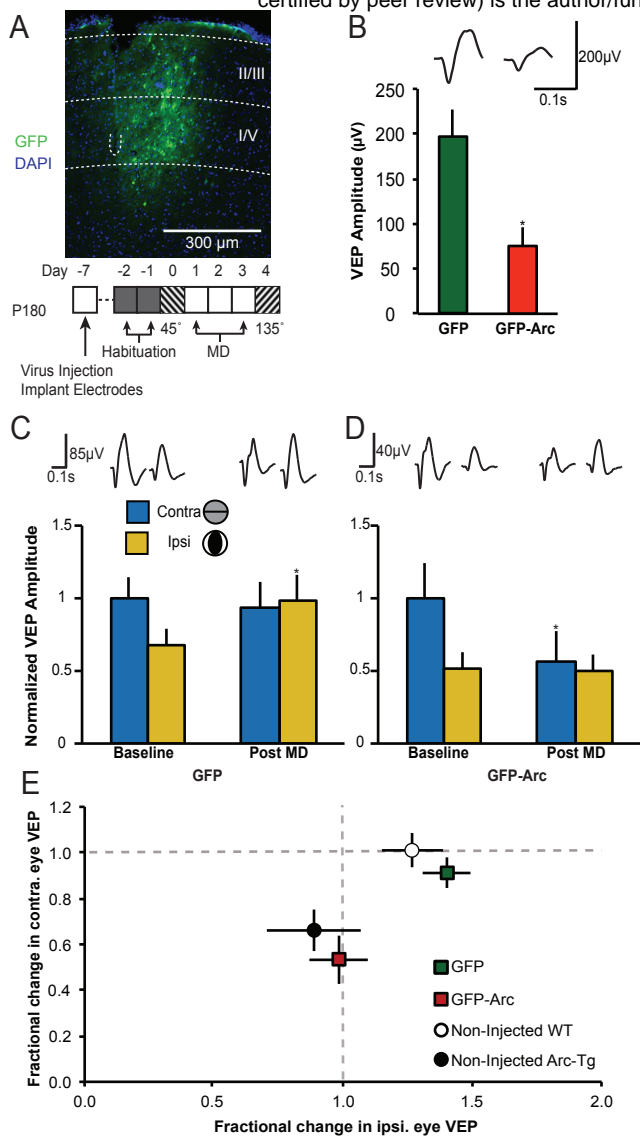

**Figure 4**

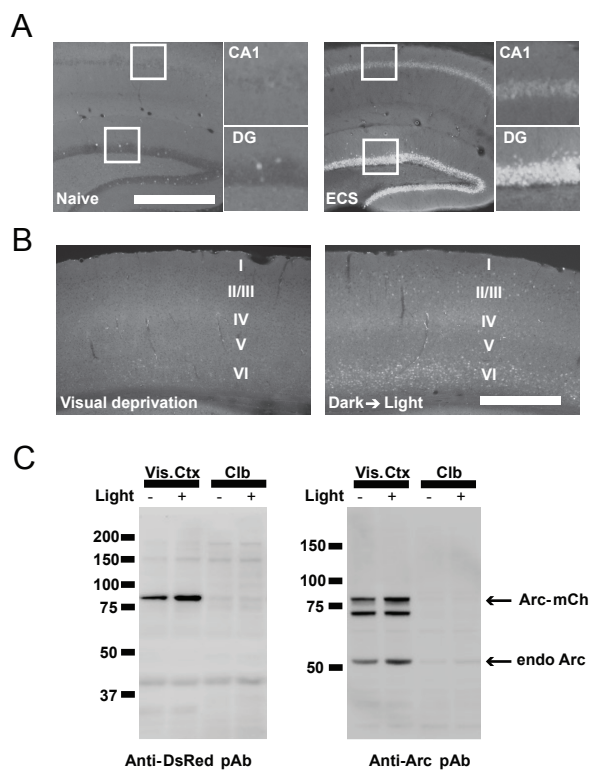

**Figure S1**
